# Supplementary material for: Humoral and Cellular Immune Responses Induced by Bivalent DNA Vaccines Expressing Fusion Capsid Proteins of Porcine Circovirus Genotypes 2a and 2b
Source: MDPI journal article supplement (doi:10.3390/vaccines12030324), 2024-03-18
Supplement: s1 [file s1]

**Table S1.** Predicted physico-chemical and antigenicity properties of the consensus PCV2 capsid protein and designed immunogen in comparison to natural PCV2 capsid proteins.

| Property                                          | PCV2a Cap<br>(Acc. No.<br>AIP98369.1)                                                                                      | PCV2b Cap<br>(Acc. No.<br>ACQ45276.1)                                                                                      | Consensus<br>Cap2a                                                                                                         | Consensus<br>Cap2b                                                                                                         | Bivalent immunogen<br>PCV2b-2a                                                                                             |
|---------------------------------------------------|----------------------------------------------------------------------------------------------------------------------------|----------------------------------------------------------------------------------------------------------------------------|----------------------------------------------------------------------------------------------------------------------------|----------------------------------------------------------------------------------------------------------------------------|----------------------------------------------------------------------------------------------------------------------------|
| 1. Number of amino acid residues                  | 233                                                                                                                        | 233                                                                                                                        | 233                                                                                                                        | 233                                                                                                                        | 486                                                                                                                        |
| 2. Molecular weight (kDa)                         | 27.9                                                                                                                       | 27.9                                                                                                                       | 27.9                                                                                                                       | 27.9                                                                                                                       | 57.5                                                                                                                       |
| 3. Isoelectric point (PI)                         | 10.68                                                                                                                      | 10.83                                                                                                                      | 10.69                                                                                                                      | 10.75                                                                                                                      | 10.68                                                                                                                      |
| 4. Estimated half-life                            | > 30 hours in mammalian reticulocytes, in vitro<br>> 20 hours in yeast, in vivo).<br>> 10 hours in <i>E.coli</i> , in vivo | > 30 hours in mammalian reticulocytes, in vitro<br>> 20 hours in yeast, in vivo).<br>> 10 hours in <i>E.coli</i> , in vivo | > 30 hours in mammalian reticulocytes, in vitro<br>> 20 hours in yeast, in vivo).<br>> 10 hours in <i>E.coli</i> , in vivo | > 30 hours in mammalian reticulocytes, in vitro<br>> 20 hours in yeast, in vivo).<br>> 10 hours in <i>E.coli</i> , in vivo | > 30 hours in mammalian reticulocytes, in vitro<br>> 20 hours in yeast, in vivo).<br>> 10 hours in <i>E.coli</i> , in vivo |
| 5. Aliphatic index                                | 62.23                                                                                                                      | 63.09                                                                                                                      | 62.66                                                                                                                      | 63.09                                                                                                                      | 64.12                                                                                                                      |
| 6. Instability index                              | 60.53                                                                                                                      | 59.81                                                                                                                      | 57.84                                                                                                                      | 59.69                                                                                                                      | 57.35                                                                                                                      |
| 7. GRAVY                                          | -0.828                                                                                                                     | -0.833                                                                                                                     | -0.875                                                                                                                     | -0.830                                                                                                                     | -0.816                                                                                                                     |
| 8. Antigenicity by Vaxigen v2.0 (threshold > 0.4) | 0.557                                                                                                                      | 0.615                                                                                                                      | 0.601                                                                                                                      | 0.619                                                                                                                      | 0.604                                                                                                                      |

#### Consensus Cap2a

MTYPRRRYRRRRHRPRSHLGQILRRRPWL VHPRHRYRWRRKNGIFNTRLSRTFGYTV-  
KATTVRTPSWAVDMLRFNLDDFVPPGGGTNKISIPFEYYRIRKVKVEFWPCSPITQGDRGVGSTAVILDDNFVPKATAQTYDPYVN  
YSSRHTIPQFYSYHSRYFTPKPVLDSTIDYFQPNKRNQLWLRLQTSRNVDPVGLGTAFEN-  
SKYDQDYNIRVTMYVQFREFNLKDPPLKP

#### Consensus Cap2b

MTYPRRRYRRRRHRPRSHLGQILRRRPWL VHPRHRYRWRRKNGIFNTRLSRTFGYTIKRT-  
TVKTPSWAVDMMRFNINDFLPPGGGSNPRVSPFEYYRIRKVKVEFWPCSPITQGDRGVGSSAVILDDNFVTKATALTYDPYVNYSS  
RHTITQPFYSYHSRYFTPKPVLDSTIDYFQPNKRNQLWLRLQTAGNVDPVGLGTAFEN-  
SIYDQEYNIRVTMYVQFREFNLKDPPLNP

**Figure S1.** Generated consensus amino acid sequences of the PCV2a and PCV2b capsid (Cap2a and Cap2b) proteins.

MTYPRRRYRRRRHRPRSHLGQILRRRPWL VHPRHRYRWRRKNGIFNTRLSRTFGYTIKRTTVKTPSWAVDMMRFNINDFLPPGGGSNPRVSPFEYYRIRKVKVEFWPCSPITQGDRGVGSSAVILDDNFVTKATALTYDPYVNYSSRHTITQPFYSYHSRYFTPKPVLDSTIDYFQPNKRNQLWLRLQTAGNVDPVGLGTAFENSIYDQEYNIRVTMYVQFREFNLKDPPLNP  
GGGEAAAKGGG  
MTYPRRRYRRRRHRPRSHLGQILRRRPWL VHPRHRYRWRRKNGIFNTRLSRTFGYTVKATTVRTPSWAVDMLRFNLDDFVPPGGGTNKISIPFEYYRIRKVKVEFWPCSPITQGDRGVGSTAVILDDNFVPKATAQTYDPYVNYSSRHTIPQFYSYHSRYFTPKPVLDSTIDYFQPNKRNQLWLRLQTSRNVDPVGLGTAFENSKYDQDYNIRVTMYVQFREFNLKDPPLKP  
IPNPLLGLD

**Figure S2.** Amino acid sequences of the bivalent immunogen Cap2b-2a. Linker is indicated in blue; V5 tag at the C-terminus is indicated in red.

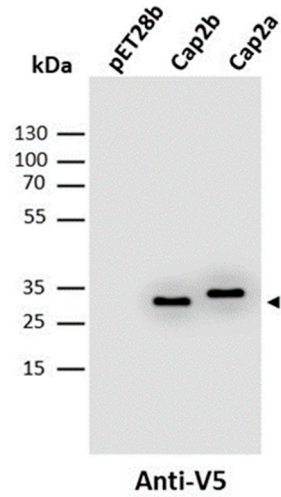

**Figure S3.** Expression of capsid proteins of PCV2a and PCV2b in *E. coli*. *E. coli* strain BL21(DE3) *pLberaysS* bearing recombinant pET28b plasmid was grown and induced with 1 mM IPTG for 3 hours at 37 °C. The cells were harvested and lysed. Only soluble fraction was used to confirm the protein expression by Western blot using anti-V5 antibody as a primary antibody. Different gene constructs used in the transformation are indicated on the top of each well. Predicted sizes of Cap2a and Cap2b are depicted.

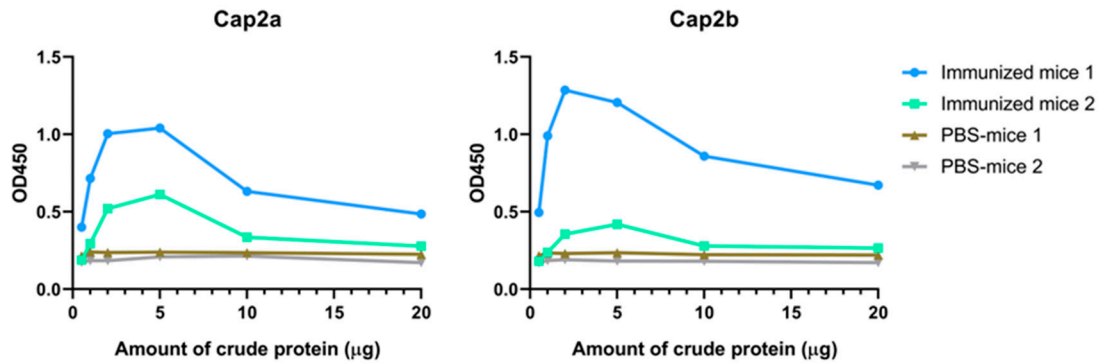

**Figure S4.** Optimization of protein amount used in ELISA. ELISA was performed with a 1:100 diluted serum from mice receiving vaccine and PBS. Various amounts of the Cap2a and Cap2b proteins in *E. coli* lysate (0.5 μg, 1 μg, 2 μg, 5 μg, 10 μg, and 20 μg/well) were tested.

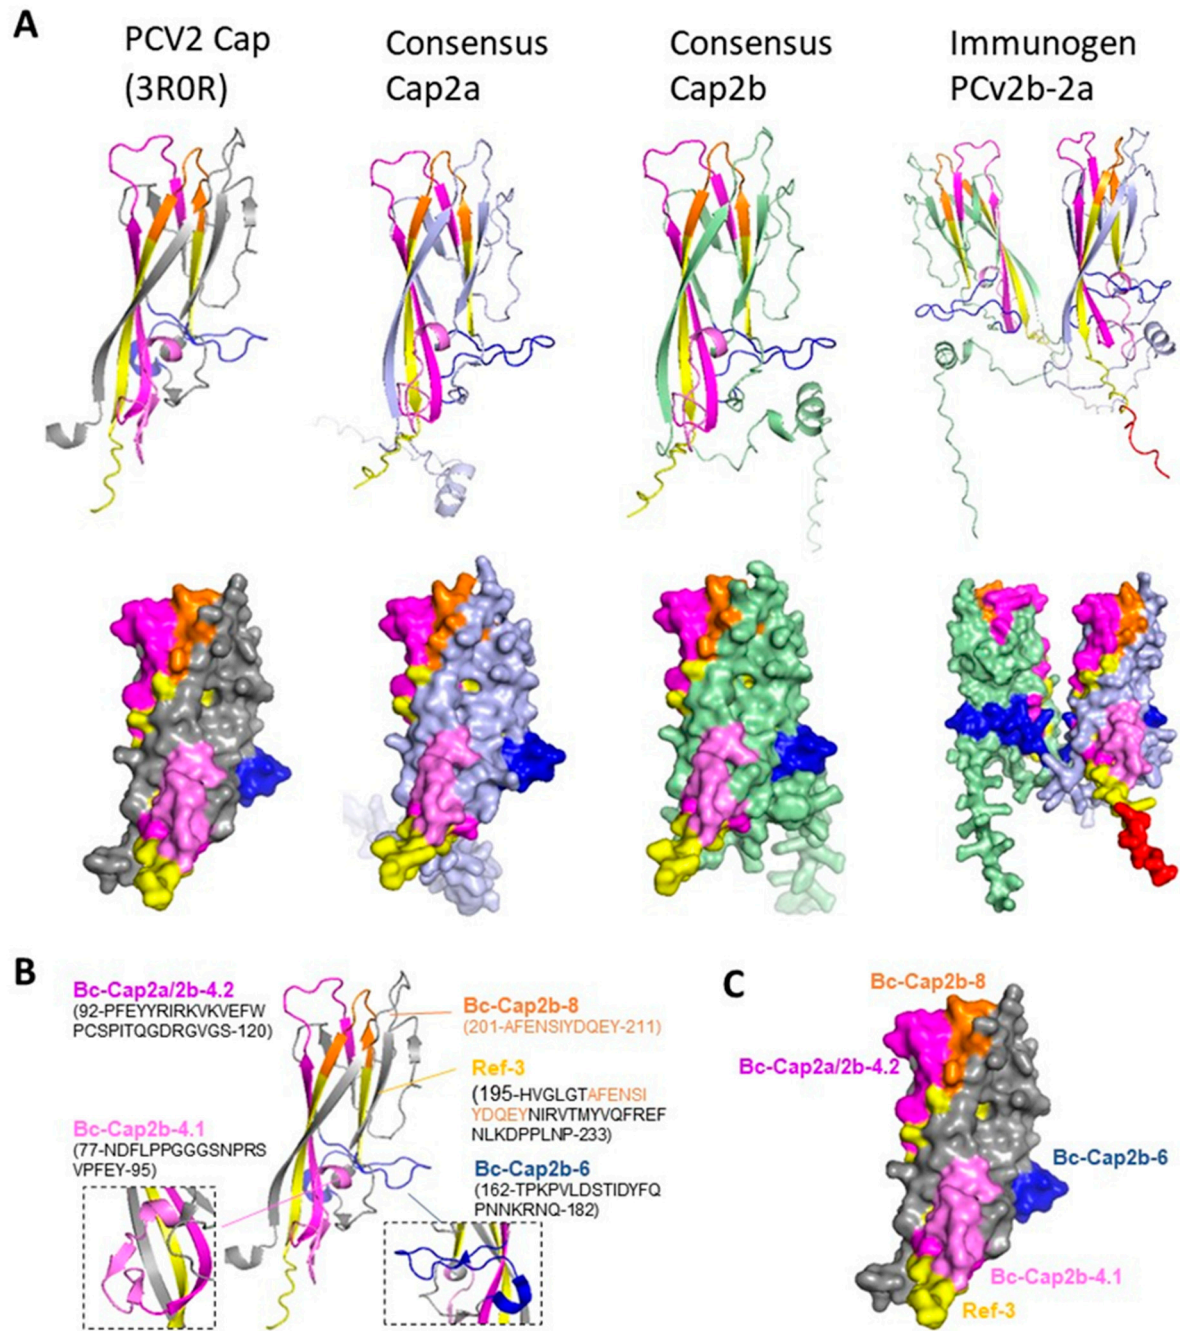

**Figure S5.** 3-D structure of the PCV2 cap proteins labeled with the immunodominant linear B-cell epitopes. **(A)** Predicted 3-D structures of the monomeric consensus Cap2a and Cap2b proteins in comparison to 3-D structure of the PCV2 capsid protein from database (PDB 3R0R). 3-D structures of the consensus Cap2a and Cap2b proteins were predicted using the ColabFold v1.5.5: AlphaFold2 online server. Top panel presents 3-D structure with secondary structure composition; bottom panel presents surface of the proteins. **(B)** Location and secondary composition of the immunodominant linear B-cell epitopes on the PCV2 capsid protein (PDB 3R0R). Each epitope is labeled with different colors. **(C)** Surface exposure of each immunodominant linear B-cell epitope on the PCV2 Cap protein.

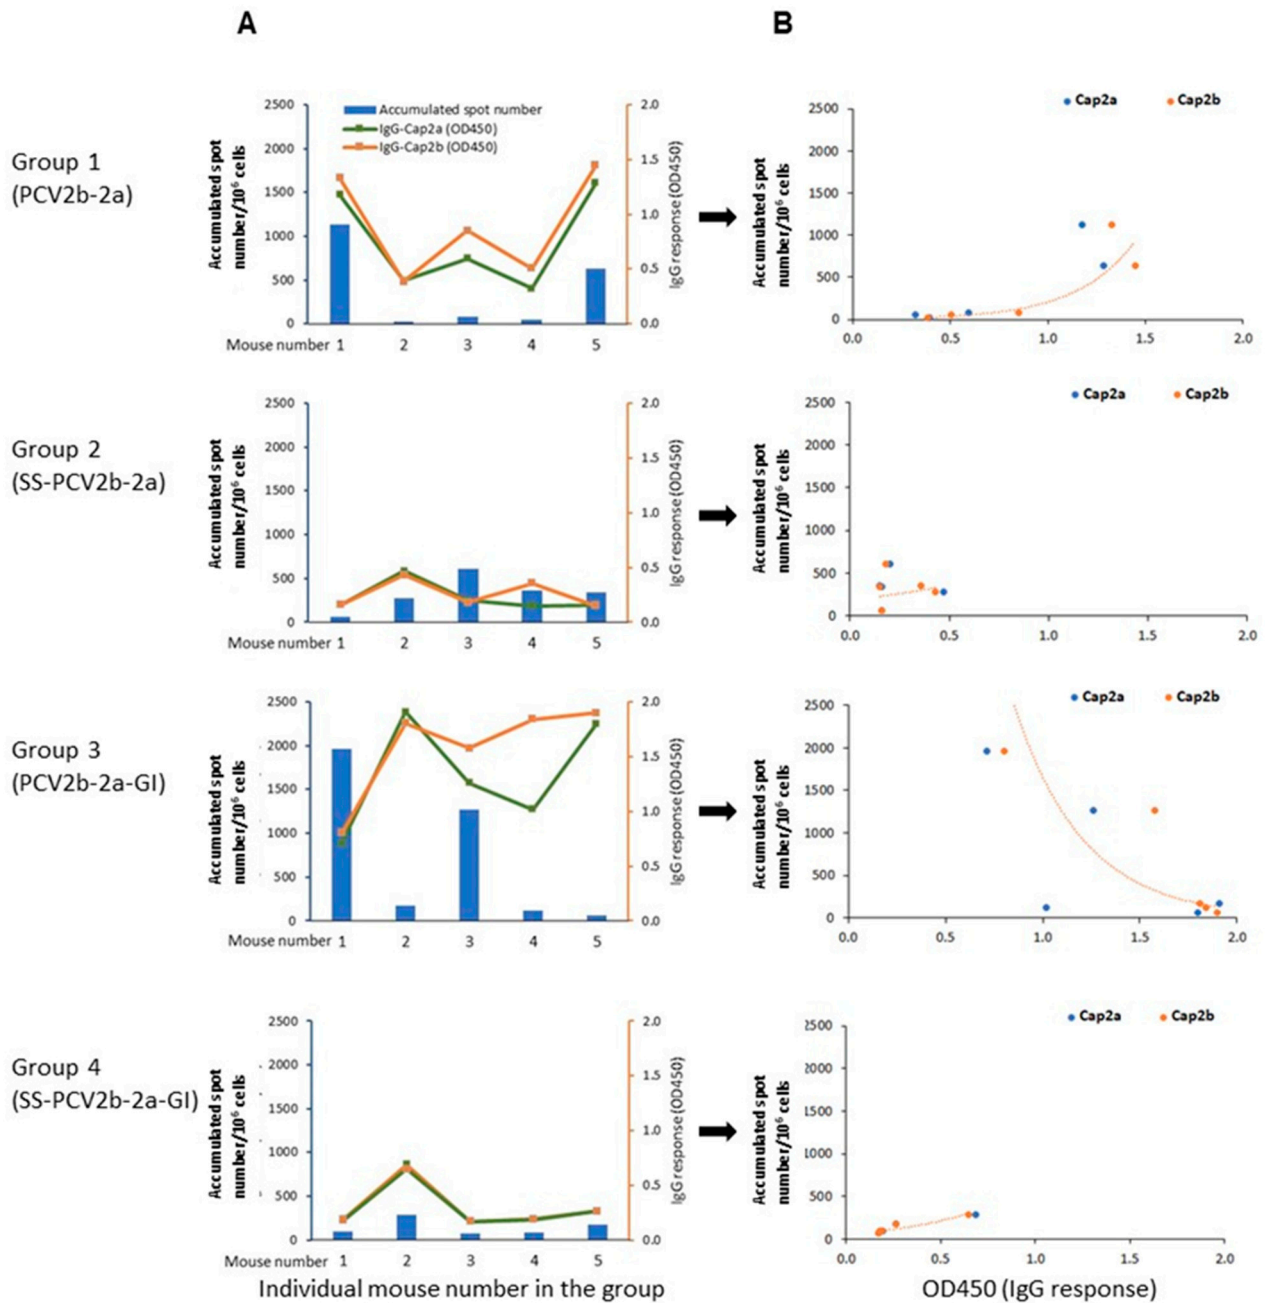

**Figure S6.** Correlation of the T cell response and antibody response (total IgG) of all four groups of the immunized mice. **(A)** Graphs combining T cell response (accumulated spot number in primary Y-axis) and total IgG response (OD450 in secondary Y-axis) of each mouse in the group. **(B)** correlation of the T cell response (X-axis) and antibody response (Y-axis). Orange line is a trend line indicating correlation between the T cell response and antibody response.
